# Supplementary material
Source: Springer Nature journal article supplement (https://www.springermedizin.de/resource/supplementary/12889_2012_4118_MOESM2_ESM.pdf/9491696)

**Intervention**

**Mediating variables**

**Outcomes**

health promotion  
intervention targeting  
physical activity and  
healthy eating

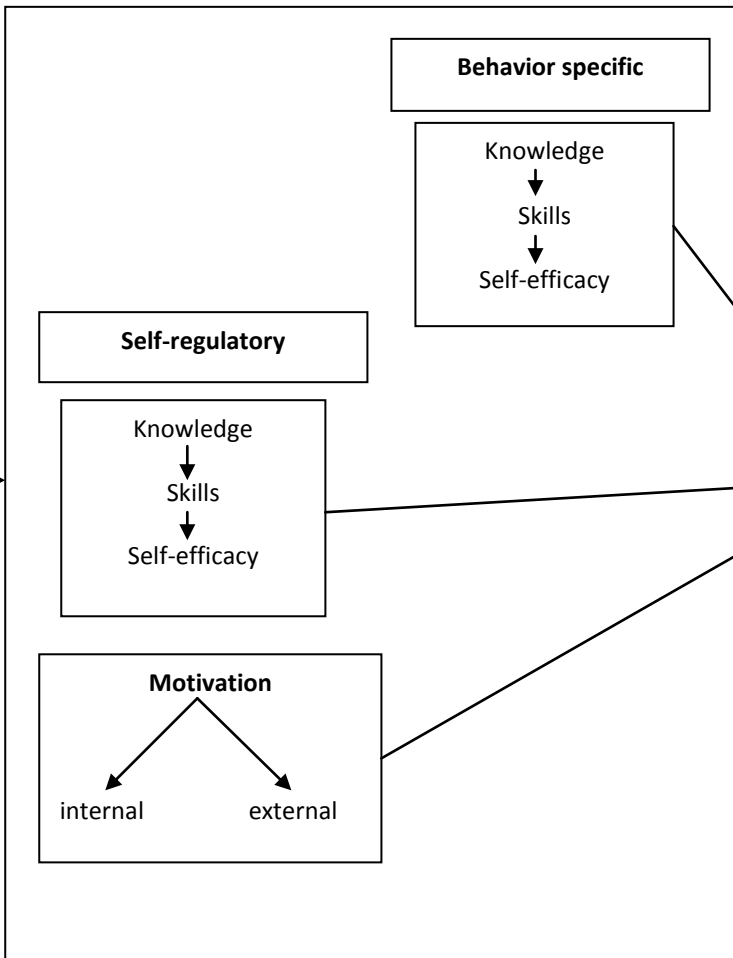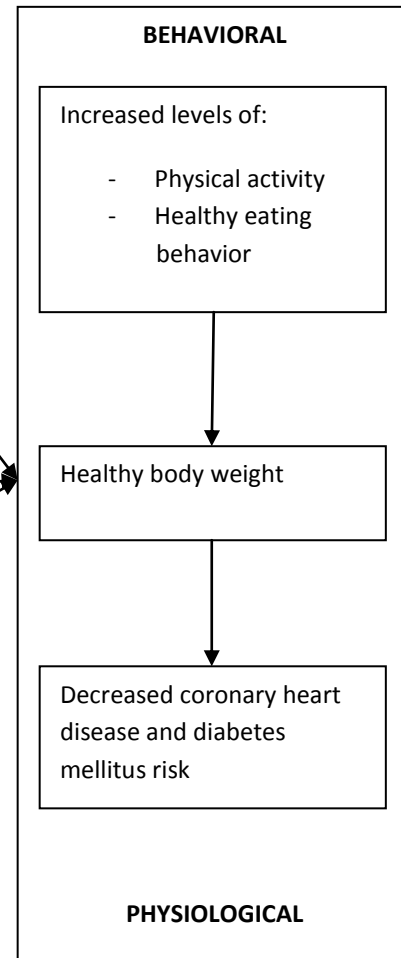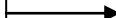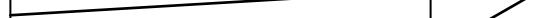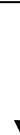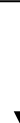

Supplement: MOESM2 [file 9491696]
